# Supplementary material
Source: ML conference proceedings conference paper supplement (https://openreview.net/forum?id=xeFKtSXPMd)
Supplement: supplementary_material [file attachment]

# 1 Table of Notation

Table 1: Table of Model Elements

|                  |                                                                 |
|------------------|-----------------------------------------------------------------|
| $z_k$            | Vector of sensed values                                         |
| $z_{0:k}$        | History of sensed values to date                                |
| $u_k$            | Vector of control inputs                                        |
| $u_{0:k}$        | History of control inputs to date                               |
| $y_{k+\Delta T}$ | Performance metrics over time $k$ to $k + \Delta T$             |
| $J$              | Reward function maps performance metrics to a scalar            |
| $\theta_k$       | System parameters, intrinsic and extrinsic (unknown)            |
| $\tau_k$         | Control objective derived from current task                     |
| $g_k$            | Vector of control parameters                                    |
| $C$              | Control law $u_k = C(g_k, \tau_k, z_{0:k}, u_{0:k})$ (grey-box) |
| $\Delta T$       | Frequency at which OCCAM adapts and computes new gains          |

## 2 Details on Simulated Platforms

In this section we provide additional details about each of our simulated evaluation platforms, including two benchmark functions which are commonly used to test global functional optimization algorithms.

### 2.1 Benchmark Functions

We first validate our method on randomized variations of two common global optimization benchmark functions [1]. The first is the Branin function, which has a 2D input space and 1D output space:

$$f(x) = a(x_2 - bx_1^2 + cx_1 - r)^2 + s(1 - t)\cos(x_1) + s$$

We treat as system parameters the six constants that parameterize the shape of the Branin function:  $\theta = [a, b, c, s, t, r]$ .

The second is the Hartmann function, which has a 6D input space and 1D output space:

$$f(x) = - \sum_i^4 \theta_i \exp \left( - \sum_{j=1}^6 A_{ij} (x_j - P_{ij})^2 \right)$$

Where  $A$  and  $P$  are constant matrices, and we randomize over the 4-dimensional vector  $\theta$  as system parameters.

For these benchmark functions, there are no measured quantities  $z_{0:k}$  or control actions  $u_{0:k}$ . We consider the inputs to the benchmark functions to be the “gains”  $g_k$ , and the outputs of the functions to be the performance measures  $y_k$ . Therefore the data tuples for these functions consist of only the inputs  $x$  and scalar “metrics”  $y = f(x)$ . For these functions, the reward function is simply set to the negative of the scalar function values:  $J(y) = -y$ . Because there is no history context, the context-only baseline in these two examples is simply our method without weight adaptation.

For the benchmark functions, we use F-PACOH [2], which is based on training neural networks with regularization to serve as mean and kernel functions in a GP. F-PACOH is ill-suited to our robotic tests due to the high dimensionality of the full input space to the networks, so we use the LK-GP baseline in our robotic experiments instead.

### 2.2 2D Race Car

Our first simulated robotic system is a 2-dimensional car racing around a track, modified from the OpenAI Gym “Car Racing” environment [3]. The environment models a powerful rear-wheel-drive

car with sliding friction, making control nontrivial while trying to maximize speed on track. The system has three control inputs:  $u_k = [u_s, u_g, u_b]$ . The controller  $C$  of the car consists of a proportional-plus-derivative (PD) controller that computes steering input  $u_s$  to steer the car towards the centerline of the track and a simple control law that accelerates the car by force  $u_g$  on straightaways up to a maximum speed, or brakes the car by force  $u_b$  for corners above a certain curvature threshold. The sensor measurements of this system are  $z_k = [v, \omega_k, e_{\text{lat}}]$ , where  $v$  is the forward velocity of the car,  $\omega_k$  is the angular velocity, and  $e_{\text{lat}}$  is the lateral distance between the car and the track centerline. The controller  $C$  uses  $z_k$  and an estimate for track curvature,  $c$ , derived from a vector of upcoming track waypoints  $\tau_k$  to compute  $u_k$  as follows:

$$\begin{aligned} u_s &= k_{ps} e_{\text{lat}} + k_{ds} \dot{e}_{\text{lat}} \\ u_g &= \begin{cases} k_{pg}, & \text{if } v \leq v_{\text{max}} \\ 0, & \text{otherwise} \end{cases} \\ u_b &= \begin{cases} k_{pb}, & \text{if } c \geq c_{\text{thresh}} \\ 0, & \text{otherwise} \end{cases} \end{aligned}$$

The tunable parameters of this controller are

$$g = [k_{ps} \ k_{ds} \ k_{pg} \ k_{pb} \ v_{\text{max}} \ c_{\text{thresh}}]$$

The racing car environment has three unknown system parameters  $\theta = [m, p, \mu]$ , which are respectively the mass of the car, the car's engine power, and the friction between the tires and track.

For the racing car, the evaluation function computes the vector of performance metrics

$$y_{k:k+\Delta T} = \frac{1}{\Delta T} \left[ \frac{1}{1 + \sum_i e_{\text{lat}i}}, \frac{1}{1 + \sum w_i}, \sum v_i \right]$$

These are respectively the inverse average lateral tracking error, inverse of total number of timesteps during which a wheel was slipping, and average velocity over a fixed evaluation horizon. We invert tracking error and wheelslip since, in general, they ought to be minimized. In this case, the evaluation horizon is not a fixed  $\Delta T$  but instead is however long it takes for the car to traverse a fixed distance on track. For online testing of this system, we set the reward function to be a weighted combination of the reward terms:  $J(y) = \sum_{j=0}^3 r_j y[j]$ .

## 2.3 Quadrotor with Model-Based Controller

Our second simulated platform is a quadrotor MAV equipped with a geometric trajectory tracking controller defined on SE(3) [4]. This controller takes in a reference trajectory  $\tau_k$  defined in the quadrotor's flat output space: position  $(p_x, p_y, p_z)$  and yaw. The controller computes a feedforward motor speed command based on  $\tau_k$  using the quadrotor's nominal mass, inertial tensor, thrust and drag torque coefficients. It then uses measurements from the quadrotor  $z_k = [p_x, p_y, p_z, v_x, v_y, v_z, R]_k$ , where  $R$  is the rotation matrix representation of attitude, to compute feedback commands to correct tracking errors. The controller is parameterized by PD gains on the 3D position and PD gains on the attitude:  $g_k = [k_x, k_v, k_R, k_\Omega]$  (following the convention given by [4]). The quadrotor has five unknown system parameters which are the quadrotor's mass, principal moments of inertia, and thrust coefficient:  $\theta = [m, I_{xx}, I_{yy}, I_{zz}, k_\eta]$ . The baseline controller is only aware of the nominal parameters, which are centered around those of the Crazyfly platform [5], and not the actual values. Thus, the feedback gains must be used to compensate for this parametric error. For more detailed information about the quadrotor's dynamics and the controller derivation, see [4].

For this system, the four performance measures  $y$  are the inverted average positional tracking error, inverted average yaw tracking error, inverted average pitch and roll, and inverted average commanded thrust over the episode. Following the racing car example, we choose the reward function to be a weighted combination of the terms of  $y$ :  $J(y) = \sum_{j=0}^4 r_j y[j]$ . For this system, we set  $\Delta T = 4$  seconds.

For our quadrotor experiments, the commanded trajectories  $\tau$  consist of 3-dimensional ellipsoidal trajectories of varying radii and frequencies. Because of the simplicity of these trajectories, we do not have to provide information about  $\tau$  as input to the network for this system. We leave the incorporation of more general and complex trajectories to future work. We use RotorPy [6] and its included SE(3) controller for all quadrotor simulations. For this environment, we also evaluate our framework on a physical quadrotor with the same controller and performance measures.

## 2.4 Quadrupedal Robot with Learned Locomotion Policy

Our third simulated robotic platform is a quadrupedal robot equipped with a static pretrained locomotion policy  $\pi$  trained using model-free RL [7].  $\pi$  outputs joint angles such that the torso of the robot follows a velocity twist command  $c_k = (\dot{x}_{\text{des}}, \dot{y}_{\text{des}}, \dot{\omega}_{\text{des}})$ . The policy takes as high-dimensional input measurements  $z_k$  the joint positions and velocities  $q_k, \dot{q}_k$ , previous joint angle commands  $a_{k-1}$ , commands  $c_k$ , timing reference variables, and estimated base velocity and ground friction. We treat  $\pi$  as our controller  $C$  for this system.

Although  $\pi$  is parameterized by a deep neural network, it is also conditioned on an additional command that allows the user to specify high-level behaviors that the policy should follow:

$$b_k = [\theta_1^{\text{cmd}}, \theta_2^{\text{cmd}}, \theta_3^{\text{cmd}}, f^{\text{cmd}}, h^{\text{cmd}}, h_f^{\text{cmd}}, s^{\text{cmd}}]$$

The three terms  $[\theta_1^{\text{cmd}}, \theta_2^{\text{cmd}}, \theta_3^{\text{cmd}}]$  jointly specify the quadrupedal gait,  $f^{\text{cmd}}$  is the commanded stepping frequency,  $h^{\text{cmd}}$  is the commanded body height,  $h_f^{\text{cmd}}$  is the commanded footswing height, and  $s^{\text{cmd}}$  is the commanded stance width. Thus, the policy tries to follow the velocity command  $c_k$  while satisfying the behavior constraints. In the original work  $b_k$  is a quantity to be selected by a human operator, while in this work we treat  $b_k$  as the controller parameters to be tuned automatically based on the quadruped’s randomized parameters and the task  $c_t$ . For details on how the learned policy is trained, see [7].

The randomized system parameters  $\theta_k$  for the quadruped are added mass payloads to the robot base, motor strengths, and the friction and restitution coefficients of the terrain. Although the  $\pi$  contains an estimator module to regress the ground friction, it does not receive direct observations of any of these parameters.

For use in our method, we input only a reduced-dimension subset of  $z_k$  into our prediction model network consisting of the estimated base linear and angular velocities and joint torques applied by the motors.

The four performance measures for the quadruped are the inverted average velocity errors along each axis of the command and inverted total commanded torque over the evaluation horizon. For this system, we set the evaluation horizon  $\Delta T = 3$  seconds.

The reward function for the quadruped has the same form as the quadrotor system:  $J(y) = \sum_{j=0}^4 r_j y[j]$ . All simulations are done using code and pretrained models from [7] and the Isaac Gym simulator [8].

|            | History Size | Encoder Layers | Encoded Dim | Network Layers | Nonlinearity | Basis Size | Phase 1 epochs | Phase 2 epochs |
|------------|--------------|----------------|-------------|----------------|--------------|------------|----------------|----------------|
| Branin     | -            | -              | -           | [16,16,16]     | ReLU         | 5          | 50             | 45             |
| Hartmann   | -            | -              | -           | [32, 32, 32]   | ReLU         | 15         | 75             | 45             |
| Racing Car | 25           | [32, 32]       | 15          | [32, 32, 32]   | ReLU         | 5          | 40             | 55             |
| Quadrotor  | 25           | [64, 64]       | 15          | [64, 64, 64]   | ReLU         | 15         | 50             | 40             |
| Quadruped  | 20           | [64, 64]       | 15          | [64, 64, 64]   | ReLU         | 15         | 50             | 15             |

Table 2: Architecture and Training Hyperparameters for OCCAM Basis Function Network for all tested systems

|            | History Buffer Size | Encoder Layers | Encoded Dim | Network Layers | Nonlinearity | Meta Training Epochs | Inner Loop Steps |
|------------|---------------------|----------------|-------------|----------------|--------------|----------------------|------------------|
| Branin     | -                   | -              | -           | [16,16,16]     | ReLU         | 35                   | 10               |
| Hartmann   | -                   | -              | -           | [32, 32, 32]   | ReLU         | 70                   | 20               |
| Racing Car | 25                  | [32, 32]       | 15          | [32, 32, 32]   | ReLU         | 70                   | 10               |
| Quadrotor  | 25                  | [64, 64]       | 25          | [64, 64, 32]   | ReLU         | 25                   | 20               |
| Quadroped  | 20                  | [64, 64]       | 15          | [64, 64, 64]   | ReLU         | 35                   | 20               |

Table 3: Architecture and Training Hyperparameters for Reptile baseline for all tested systems

|          | Network Layers | Num fitting iters | Weight Decay | Prior Factor | Feature Dim |
|----------|----------------|-------------------|--------------|--------------|-------------|
| Branin   | [32,32,32]     | 2500              | 3e-5         | 0.06         | 5           |
| Hartmann | [32, 32, 32]   | 2500              | 0.03         | 0.23         | 6           |

Table 4: Training Details for F-PACOH baseline for all tested systems

### 3 Model Training and Testing Details

The datasets for the robotic systems each consist of  $N = 1500$  batches of  $N_B = 64$  datapoints each. The hyperparameters of each dataset and network are provided in the supplementary material. Note that our method does not require sampling only optimal or high-performing gains to generate data - only random ones. Thus, the dataset for each system consists of  $N$  batches of datapoints:  $[(g, \tau, z, u, y)_{0:N_B}]_{0:N}$ . Each of these batches is used as a “task” for a single inner loop during the meta-training process.

We find that we are able to use small networks to model each system; the networks are all fully-connected networks that consist of 3 hidden layers with fewer than 64 hidden units, outputting between 5-20 bases, indicating that many of the robotic systems that we are interested in controlling can be effectively modeled with a relatively small number of parameters. The exact network layer sizes and training hyperparameters are given in the supplementary material. All models are implemented and trained in PyTorch [9].

Architectural details and training hyperparameters for OCCAM’s basis function network, Reptile, and F-PACOH are presented in Tables 2, 3, and 4 respectively. The F-PACOH training hyperparameters were chosen in accordance with experiments conducted in the original paper.

Training and testing parameter ranges for each system evaluated in this work are shown in Tables 5, 6, 7, 8, and 9. For the reward curves and tables shown in the main submission, test system parameters were sampled exclusively from the set difference of the test parameter range and training parameter range.

| Parameter | Training |       | Testing |      |
|-----------|----------|-------|---------|------|
|           | low      | high  | low     | high |
| a         | 0.8      | 1.2   | 0.5     | 1.5  |
| b         | 0.11     | 0.13  | 0.1     | 0.15 |
| c         | 1.2      | 1.8   | 1       | 2    |
| r         | 5.5      | 6.5   | 5       | 7    |
| s         | 9        | 11    | 8       | 12   |
| t         | 0.035    | 0.045 | 0.03    | 0.05 |

Table 5: Parameter ranges for Branin experiments

| Parameter  | Training |      | Testing |      |
|------------|----------|------|---------|------|
|            | low      | high | low     | high |
| $\theta_1$ | 1.0      | 1.5  | 0.5     | 1.5  |
| $\theta_2$ | 1.0      | 1.2  | 0.6     | 1.4  |
| $\theta_3$ | 2.4      | 3.0  | 2.0     | 3.0  |
| $\theta_4$ | 3.0      | 3.4  | 2.8     | 3.6  |

Table 6: Parameter ranges for Hartmann experiments

| Parameter      | Training |       | Testing |      |
|----------------|----------|-------|---------|------|
|                | low      | high  | low     | high |
| Size           | 0.01     | 0.03  | 0.005   | 0.04 |
| Engine Power   | 2.5e4    | 4.5e4 | 2e4     | 5e4  |
| Friction Limit | 250      | 450   | 200     | 500  |

Table 7: Parameter ranges for Racing Car. Note that these quantities are given in internal units used by the simulator, not SI units.

| Parameter                            | Training |      | Testing |      |
|--------------------------------------|----------|------|---------|------|
|                                      | low      | high | low     | high |
| Mass (kg)                            | 0.02     | 0.09 | 0.01    | 0.1  |
| $I_{xx}$ (kg · m <sup>2</sup> )      | 2e-6     | 9e-4 | 1e-6    | 1e-3 |
| $I_{yy}$ (kg · m <sup>2</sup> )      | 2e-6     | 9e-4 | 1e-6    | 1e-3 |
| $I_{zz}$ (kg · m <sup>2</sup> )      | 2e-6     | 9e-4 | 1e-6    | 1e-3 |
| $k_{\eta}$ (N/(rad/s) <sup>2</sup> ) | 2e-8     | 8e-7 | 1e-8    | 1e-6 |

Table 8: Parameter ranges for Quadrotor

| Parameter               | Training |      | Testing |      |
|-------------------------|----------|------|---------|------|
|                         | low      | high | low     | high |
| Added Payload (kg)      | -0.8     | 2.5  | -1.0    | 4.0  |
| Motor Strength Factor   | 0.9      | 1.0  | 0.8     | 1.1  |
| Friction Coefficient    | 0.25     | 1.75 | 0.2     | 2.0  |
| Restitution Coefficient | 0.1      | 0.3  | 0.05    | 5.0  |

Table 9: Parameter ranges for Quadraped

## 114 4 Benchmark Function Results

Table 10: Average Final Obtained Value on Benchmark Systems

|                      | Average Value over Last 5 Trials ( $\downarrow$ ) |                                   |
|----------------------|---------------------------------------------------|-----------------------------------|
|                      | Branin                                            | Hartmann ( $\times 10^{-4}$ )     |
| F-PACOH [2]          | $2.26 \pm 0.70$                                   | $3.30 \pm 4.55$                   |
| Reptile [10]         | $3.47 \pm 11.79$                                  | <b><math>1.14 \pm 1.98</math></b> |
| OCCAM (no-meta)      | $1.80 \pm 0.77$                                   | $7.42 \pm 11.4$                   |
| OCCAM (context-only) | $4.25 \pm 3.92$                                   | $12.83 \pm 15.7$                  |
| <b>OCCAM (Ours)</b>  | <b><math>1.65 \pm 0.49</math></b>                 | $3.14 \pm 5.97$                   |

115 We report the average final reward obtained by all methods on the Branin and Hartmann benchmarks  
116 in Table 10, and show minima obtained by each method over time in Figure 1. Notably, our method  
117 performs well in both settings. In the Branin setting, OCCAM learns a good initialization and finds  
118 the best final minimum. In the Hartmann setting, even though OCCAM learns a relatively poor  
119 prior, it is able to adapt and find the same final minimum as F-PACOH.

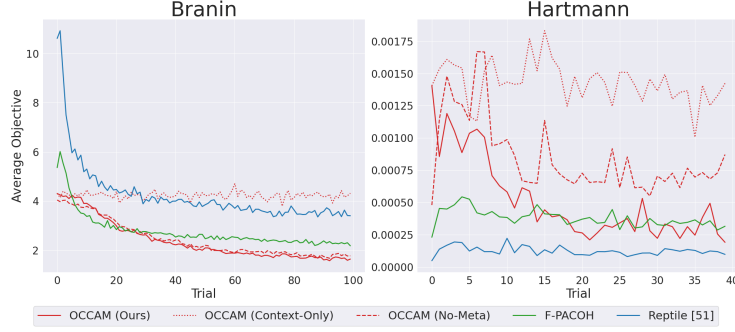

Figure 1: Minima found on each benchmark function (Lower is Better)

## 5 Raw Performance Metrics

Figures 2, 3, and 4 show the raw performance metrics obtained by each method on each system in the trials in which they did not crash. We note that each method is not directly optimizing for these raw metrics, but instead a weighted combination of their normalized versions, so good or bad performance in an individual metric in these plots does not necessarily translate to high or low reward in the plots reported in the paper. For example, in the Racing Car example, our method obtains a lower average speed than many other methods; however, this makes sense as, in the scalarized objective the model was optimizing for, the speed metric was weighted much lower than the tracking error metric. Also to faithfully report the raw metrics without the crashes skewing the averages, we filter out the runs that crashed. For example, in the quadrotor example, although Reptile performs well when it selects gains that don't result in crashes, its higher crash rate brings down its overall average reward.

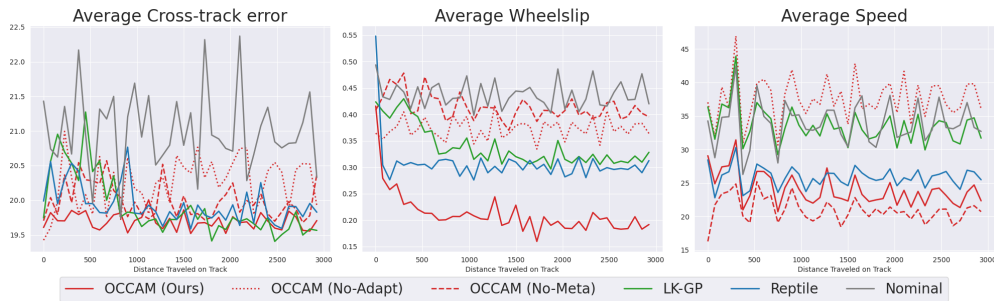

Figure 2: Raw performance metrics obtained by each method on our out-of-distribution racing car test set in successful runs.

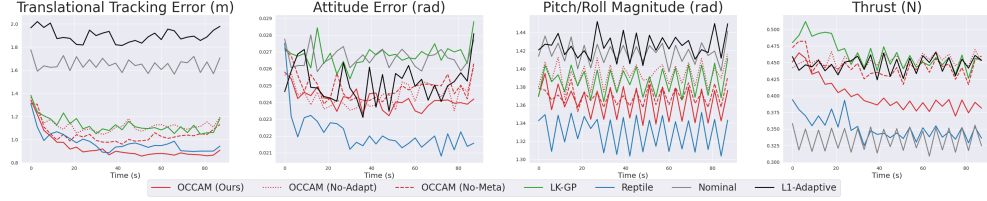

Figure 3: Raw Performance metrics obtained by each method on our out-of-distribution quadrotor test set in successful runs.

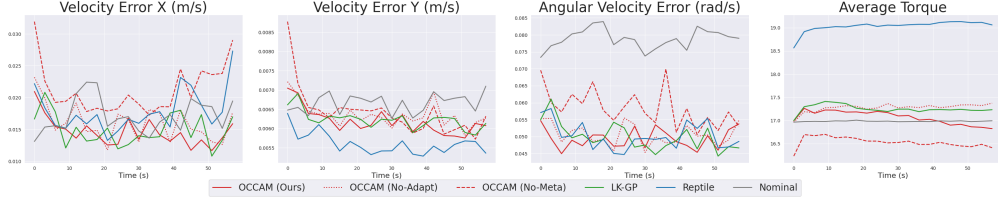

Figure 4: Raw Performance metrics obtained by each method on our out-of-distribution quadruped car test set in successful runs.

## 6 Additional Simulation Experiments

### 6.1 In-Distribution Experiments

Table 11: Average Final Reward and Crash Rate on In-Distribution Robotic Systems

| Method                   | Race Car                     |                          | Quadrotor                    |                          | Quadruped                    |                          |
|--------------------------|------------------------------|--------------------------|------------------------------|--------------------------|------------------------------|--------------------------|
|                          | Avg Final Rwd ( $\uparrow$ ) | Crash % ( $\downarrow$ ) | Avg Final Rwd ( $\uparrow$ ) | Crash % ( $\downarrow$ ) | Avg Final Rwd ( $\uparrow$ ) | Crash % ( $\downarrow$ ) |
| Nominal                  | $0.50 \pm 0$                 | 0                        | $1.15 \pm 0.13$              | 47.9                     | $0.66 \pm 0.9$               | 14.7                     |
| LK-GP                    | $0.49 \pm 0.08$              | 0                        | $1.79 \pm 0.38$              | 37.7                     | $0.74 \pm 0.08$              | 8.3                      |
| Reptile                  | $0.42 \pm 0.13$              | 2.7                      | $1.19 \pm 0.37$              | 33.8                     | $0.72 \pm 0.1$               | 9.4                      |
| $\mathcal{L}1$ -Adaptive | -                            | -                        | $1.37 \pm 0.55$              | 57.5                     | -                            | -                        |
| OCCAM (context-only)     | $0.47 \pm 0.06$              | 2                        | $1.94 \pm 0.26$              | 32.5                     | $0.76 \pm 0.07$              | 5.6                      |
| <b>OCCAM (Ours)</b>      | $0.44 \pm 0.19$              | 4                        | $1.82 \pm 0.40$              | 37.5                     | $0.74 \pm 0.09$              | 8.7                      |

We also run our method and each baseline on test sets randomly sampled from the training distributions for each of the robotic systems (see Tables 7, 8, and 9). The average final obtained reward and crash rates are reported in Table 11. The performances of each method naturally improve in this setting as the sampled system parameters lie closer to the nominal parameters, but in particular the context-only baseline, which only uses the fixed context encoder for sysid, and the LK-GP baseline both obtain amongst the highest rewards and perform similarly to OCCAM, showing, within the training distribution, these approaches perform well.

Also notable in this setting is that the  $\mathcal{L}1$ -Adaptive controller obtains higher reward than the Nominal controller, demonstrating that the adaptive control does indeed improve performance when the deviation from the nominal dynamics is smaller. However, when the parametric error grows larger in the out-of-distribution experiments in the main paper, the adaptive controller becomes unstable and reduces performance.

### 6.2 OCCAM Makes Interpretable Adaptations to the Gains

To elucidate that our method finds semantically meaningful gains, we run an additional experiment in the racing car environment where we sweep only friction coefficients across 3 different tracks and plot the average final gains chosen by OCCAM in Figure 5. As friction increases, OCCAM selects gains that cause the car to accelerate more aggressively and drive faster, while in the low friction regime, the gains tend towards slower driving (higher brake gain, lower



Figure 6

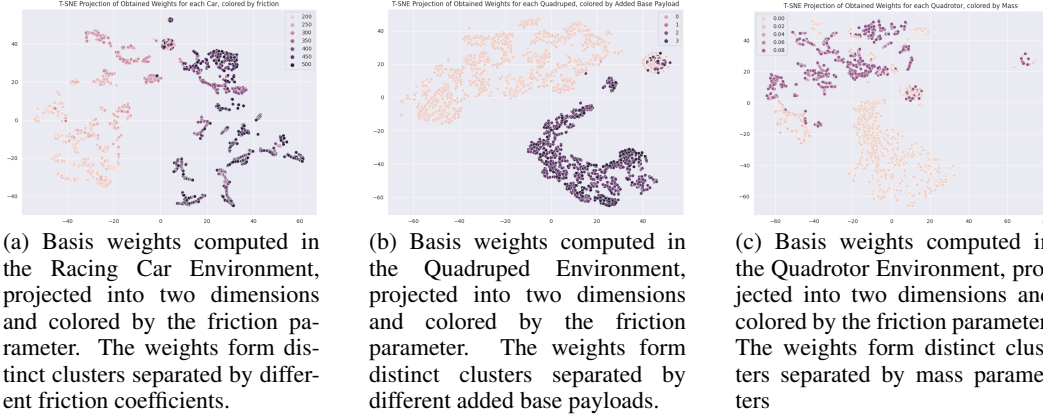

152 speed in corners). Our method logically chooses a more aggressive driving profile as available  
 153 traction increases, showing physically meaningful adaptation to changes in system parameters.  
 154

### 155 6.3 Is there structure to the learned weight space?

156 We also include preliminary experiments demonstrating  
 157 that the space of weights that OCCAM adapts in has  
 158 meaningful structure. For each test set in the paper, we  
 159 use t-SNE to project the weights computed by OCCAM's  
 160 regression procedure into two dimensions and plot the  
 161 projected weights in Figures 6a, 6c, and 6b. Note that like  
 162 the weight adaptation procedure, the t-SNE embedding  
 163 procedure has no knowledge of the underlying system  
 164 parameters. For each system, the values of the weights  
 165 distinctly cluster according to the underlying system pa-  
 166 rameters.

## 167 7 Additional

### 168 Physical Crazyflie Experiments

169 We ran additional experiments on the physical Crazyflie  
 170 platform in which we added a 5-gram mass from the beginning of the experiment and in the middle  
 171 of the experiment. Plots of the tracking error obtained by the controller with OCCAM's optimized  
 172 gains, the nominal gains, and with the  $\mathcal{L}1$ -Adaptive control augmentation are shown in Figures 7a  
 173 and 7b. In both cases, OCCAM finds gains that result in more robust tracking in the Z-axis. We  
 174 hypothesize that because our predictive model is trained on data gathered from many quadrotors  
 175 with varied masses, it learns to select gains that better compensate for these variations.

176 An interesting result are the minor, high frequency oscillations observed in the Z-axis in Figure 7a  
 177 and in the X- and Y-axes in Figure 7b towards the end of the experiment. These are most likely the  
 178 result of marginally stable closed-loop attitude dynamics. One possible solution to this is augment-  
 179 ing the performance measures  $y$  and measurement vector  $z$  with pitch and roll angular velocities,  
 180 which might encourage the predictive model and optimizer to select gains that do not result in os-  
 181 cillations. Another solution is to add small random force perturbations to the training simulations  
 182 so that marginally stable controllers achieve worse performance metrics. We leave exploring these  
 183 additions to future work.

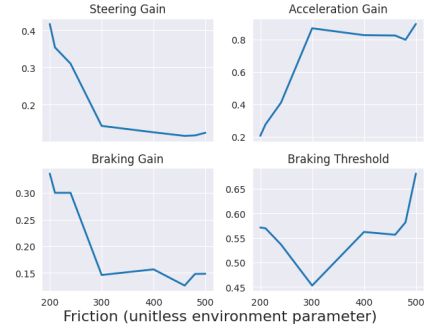



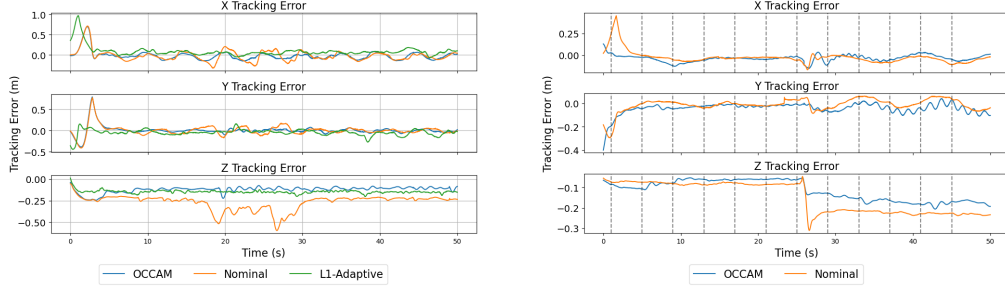

(a) Results with a 5-gram mass added from the start. (b) Results with a 5-gram mass added at roughly 26s

Figure 7: Positional tracking error results on physical Crazyflie quadrotor following a 3-dimensional ellipsoidal reference trajectory, with added masses.

## References

- [1] L. C. W. Dixon and G. P. Szego. The global optimization problem: An introduction, 1978.
- [2] J. Rothfuss, D. Heyn, jinfan Chen, and A. Krause. Meta-learning reliable priors in the function space. In A. Beygelzimer, Y. Dauphin, P. Liang, and J. W. Vaughan, editors, *Advances in Neural Information Processing Systems*, 2021. URL [https://openreview.net/forum?id=H\\_qljL8t\\_A](https://openreview.net/forum?id=H_qljL8t_A).
- [3] G. Brockman, V. Cheung, L. Pettersson, J. Schneider, J. Schulman, J. Tang, and W. Zaremba. Openai gym, 2016.
- [4] T. Lee, M. Leok, and N. H. McClamroch. Geometric tracking control of a quadrotor uav on  $se(3)$ . In *49th IEEE Conference on Decision and Control (CDC)*, pages 5420–5425, 2010. doi:10.1109/CDC.2010.5717652.
- [5] Crazyflie 2.1 — Bitcraze. <https://www.bitcraze.io/products/crazyflie-2-1/>.
- [6] S. Folk, J. Paulos, and V. Kumar. Rotorpy: A python-based multirotor simulator with aerodynamics for education and research. *arXiv preprint arXiv:2306.04485*, 2023.
- [7] G. B. Margolis and P. Agrawal. Walk these ways: Tuning robot control for generalization with multiplicity of behavior. In *6th Annual Conference on Robot Learning*, 2022. URL <https://openreview.net/forum?id=52c5e73S1S2>.
- [8] V. Makoviychuk, L. Wawrzyniak, Y. Guo, M. Lu, K. Storey, M. Macklin, D. Hoeller, N. Rudin, A. Allshire, A. Handa, and G. State. Isaac Gym: High Performance GPU-Based Physics Simulation For Robot Learning, Aug. 2021.
- [9] A. Paszke, S. Gross, F. Massa, A. Lerer, J. Bradbury, G. Chanan, T. Killeen, Z. Lin, N. Gimelshein, L. Antiga, A. Desmaison, A. Kopf, E. Yang, Z. DeVito, M. Raison, A. Tejani, S. Chilamkurthy, B. Steiner, L. Fang, J. Bai, and S. Chintala. Pytorch: An imperative style, high-performance deep learning library. In *Advances in Neural Information Processing Systems 32*, pages 8024–8035. Curran Associates, Inc., 2019. URL <http://papers.neurips.cc/paper/9015-pytorch-an-imperative-style-high-performance-deep-learning-library.pdf>.
- [10] A. Nichol, J. Achiam, and J. Schulman. On first-order meta-learning algorithms, 2018.
